# Supplementary material for: Physical Activity and Gastric Cancer Risk in Patients with and without Helicobacter pylori Infection in A Korean Population: A Hospital-Based Case-Control Study
Source: MDPI journal article supplement (doi:10.3390/cancers10100369), 2018-10-02

# Supplementary Materials: Physical Activity and Gastric Cancer Risk in Patients with and without *Helicobacter pylori* Infection in A Korean Population: A Hospital-Based Case-Control Study

Madhawa Neranjan Gunathilake, Jeonghee Lee, Aelee Jang, Il Ju Choi, Young-Il Kim and Jeongseon Kim

**Table S1.** Association between regular exercise and gastric cancer risk stratified by *H. pylori* status.

| Regular Exercise | <i>H. Pylori</i> Positive |             |                  |                     | <i>H. Pylori</i> Negative |           |                     |                     |
|------------------|---------------------------|-------------|------------------|---------------------|---------------------------|-----------|---------------------|---------------------|
|                  | Control (%)               | Cases (%)   | Model 1 (95% CI) | Model 2 OR (95% CI) | Control (%)               | Cases (%) | Model 1 OR (95% CI) | Model 2 OR (95% CI) |
| All              |                           |             |                  |                     |                           |           |                     |                     |
| No               | 223 (46.1)                | 248 (64.9)  | 1.00             | 1.00                | 130 (40.6)                | 20 (60.6) | 1.00                | 1.00                |
| Yes              | 261 (53.9)                | 134 (35.1)  | 0.46 (0.35–0.61) | 0.52 (0.38–0.70)    | 189 (59.3)                | 13 (39.4) | 0.45 (0.22–0.93)    | 0.53 (0.23–1.21)    |
| Male             |                           |             |                  |                     |                           |           |                     |                     |
| No               | 152 (45.9)                | 152 (60.32) | 1.00             | 1.00                | 74 (39.8)                 | 9 (50.0)  | 1.00                | 1.00                |
| Yes              | 179 (54.1)                | 100 (39.7)  | 0.56 (0.40–0.78) | 0.68 (0.46–1.01)    | 112 (60.2)                | 9 (50.0)  | 0.66 (0.25–1.74)    | 1.07 (0.30–3.74)    |
| Female           |                           |             |                  |                     |                           |           |                     |                     |
| No               | 71 (46.4)                 | 96 (73.9)   | 1.00             | 1.00                | 56 (42.1)                 | 11 (73.3) | 1.00                | 1.00                |
| Yes              | 82 (53.6)                 | 34 (26.2)   | 0.31 (0.19–0.51) | 0.36 (0.21–0.64)    | 77 (57.9)                 | 4 (26.7)  | 0.26 (0.08–0.87)    | 0.14 (0.03–0.68)    |

Model 1: Crude; Model 2: Adjusted for smoking, first degree family history of gastric cancer, education, occupation, monthly income and total energy intake.

**Table S2.** Association between physical activity (IPAQ categorical score) and gastric cancer risk stratified by *H. pylori* status.

| IPAQ-Categorical Score | <i>H. Pylori</i> Positive |            |                  |                     | <i>H. Pylori</i> Negative |           |                  |                     |
|------------------------|---------------------------|------------|------------------|---------------------|---------------------------|-----------|------------------|---------------------|
|                        | Control (%)               | Cases (%)  | Model 1 (95% CI) | Model 2 OR (95% CI) | Control (%)               | Cases (%) | Model 1 (95% CI) | Model 2 OR (95% CI) |
| All                    |                           |            |                  |                     |                           |           |                  |                     |
| Low                    | 166 (34.2)                | 160 (41.8) | 1.00             | 1.00                | 99 (30.9)                 | 15 (45.5) | 1.00             | 1.00                |
| Moderate               | 172 (35.4)                | 120 (31.4) | 0.72 (0.53–1.00) | 0.71 (0.50–1.02)    | 128 (40.0)                | 8 (24.2)  | 0.41 (0.17–1.01) | 0.30 (0.11–0.83)    |
| High                   | 148 (30.5)                | 102 (26.7) | 0.72 (0.51–1.00) | 0.61 (0.42–0.89)    | 93 (29.1)                 | 10 (30.3) | 0.71 (0.30–1.66) | 0.64 (0.23–1.74)    |
| <i>p</i> -trend        |                           |            | 0.087            | 0.016               |                           |           | 0.779            | 0.811               |
| Male                   |                           |            |                  |                     |                           |           |                  |                     |
| Low                    | 103 (30.9)                | 99 (39.3)  | 1.00             | 1.00                | 54 (28.9)                 | 7 (38.9)  | 1.00             | 1.00                |
| Moderate               | 118 (35.4)                | 74 (29.4)  | 0.65 (0.44–0.97) | 0.66 (0.41–1.06)    | 66 (35.3)                 | 3 (16.7)  | 0.35 (0.09–1.42) | 0.15 (0.03–0.81)    |
| High                   | 112 (33.6)                | 79 (31.4)  | 0.73 (0.49–1.09) | 0.68 (0.42–1.09)    | 67 (35.8)                 | 8 (44.4)  | 0.92 (0.31–2.70) | 0.89 (0.22–3.66)    |
| <i>p</i> -trend        |                           |            | 0.286            | 0.208               |                           |           | 0.685            | 0.433               |
| Female                 |                           |            |                  |                     |                           |           |                  |                     |
| Low                    | 63 (41.2)                 | 61 (46.9)  | 1.00             | 1.00                | 45 (33.8)                 | 8 (53.3)  | 1.00             | 1.00                |
| Moderate               | 54 (35.3)                 | 46 (35.3)  | 0.88 (0.52–1.49) | 0.89 (0.50–1.59)    | 62 (46.6)                 | 5 (33.3)  | 0.45 (0.14–1.48) | 0.40 (0.10–1.55)    |
| High                   | 36 (23.5)                 | 23 (17.7)  | 0.66 (0.35–1.24) | 0.56 (0.28–1.12)    | 26 (19.6)                 | 2 (13.3)  | 0.43 (0.09–2.19) | 0.26 (0.03–2.03)    |
| <i>p</i> -trend        |                           |            | 0.196            | 0.103               |                           |           | 0.339            | 0.216               |

Model 1. Crude; Model 2: Adjusted for smoking, first degree family history of gastric cancer, education, occupation, monthly income, total energy intake; IPAQ categorical score-Three levels of physical activity are proposed:

- 1) Low  
No activity is reported OR some activity is reported but not enough to meet category 2 or 3
- 2) Moderate  
Either of the following three criteria;
  - a) Three or more days of vigorous intensity activity of at least 20 minutes per day OR
  - b) Five or more days of moderate intensity activity and/or walking of at least 30 minutes per day OR
  - c) Five or more days of any combination of walking, moderate-intensity or vigorous intensity activities achieving a minimum of at least 600MET min/week
- 3) High  
Any one of the following two criteria;
  - a) Vigorous intensity activity on at least three days and accumulating at least 1500 MET min/week OR
  - b) Seven or more days of any combination of walking, moderate or vigorous intensity activities accumulating at least 3000MET min/week.

**Table S3.** Association between physical activity (IPAQ continuous score, MET minutes per week) and gastric cancer risk stratified by *H. pylori* status.

| All                         | <i>H. Pylori</i> Positive |            |                  |                     | <i>H. Pylori</i> Negative |           |                  |                     |
|-----------------------------|---------------------------|------------|------------------|---------------------|---------------------------|-----------|------------------|---------------------|
|                             | Control (%)               | Cases (%)  | Model 1 (95% CI) | Model 2 OR (95% CI) | Control (%)               | Cases (%) | Model 1 (95% CI) | Model 2 OR (95% CI) |
| Low-intensity activity      |                           |            |                  |                     |                           |           |                  |                     |
| T1 (0–495) [198.0]          | 134 (29.0)                | 168 (46.8) | 1.00             | 1.00                | 95 (30.8)                 | 14 (48.3) | 1.00             | 1.00                |
| T2 (495–1386) [792.0]       | 168 (36.4)                | 86 (24.0)  | 0.41 (0.29–0.58) | 0.42 (0.29–0.62)    | 99 (32.1)                 | 6 (20.7)  | 0.41 (0.15–1.11) | 0.42 (0.14–1.29)    |
| T3 (≥1386) [2079.0]         | 160 (34.6)                | 105 (29.3) | 0.52 (0.37–0.73) | 0.47 (0.33–0.69)    | 114 (37.0)                | 9 (31.0)  | 0.54 (0.22–1.29) | 0.30 (0.10–0.84)    |
| <i>p</i> -trend             |                           |            | 0.001            | <0.001              |                           |           | 0.249            | 0.032               |
| Moderate-intensity activity |                           |            |                  |                     |                           |           |                  |                     |
| Low (0–480) [0.0]           | 296 (63.4)                | 260 (69.9) | 1.00             | 1.00                | 193 (62.5)                | 19 (63.3) | 1.00             | 1.00                |
| High (≥480) [1200.0]        | 171 (36.6)                | 112 (30.1) | 0.75 (0.56–0.99) | 0.67 (0.48–0.93)    | 116 (37.5)                | 11 (36.7) | 0.96 (0.44–2.09) | 0.98 (0.40–2.39)    |
| <i>p</i> -trend             |                           |            | 0.048            | 0.015               |                           |           | 0.925            | 0.962               |
| Vigorous-intensity activity |                           |            |                  |                     |                           |           |                  |                     |
| Low (0–720) [0.0]           | 313 (66.2)                | 279 (73.6) | 1.00             | 1.00                | 208 (66.7)                | 23 (69.7) | 1.00             | 1.00                |
| High (≥720) [1920.0]        | 160 (33.8)                | 100 (26.4) | 0.70 (0.52–0.94) | 0.61 (0.43–0.85)    | 104 (33.3)                | 10 (30.3) | 0.87 (0.40–1.90) | 0.72 (0.29–1.75)    |
| <i>p</i> -trend             |                           |            | 0.019            | 0.004               |                           |           | 0.725            | 0.463               |
| Total physical activity     |                           |            |                  |                     |                           |           |                  |                     |
| T1 (0–990) [339.0]          | 151 (31.3)                | 176 (46.2) | 1.00             | 1.00                | 102 (32.1)                | 14 (42.4) | 1.00             | 1.00                |
| T2 (990–2970) [1699.5]      | 166 (34.4)                | 100 (26.3) | 0.52 (0.37–0.72) | 0.57 (0.40–0.82)    | 115 (36.2)                | 9 (27.3)  | 0.57 (0.24–1.37) | 0.41 (0.16–1.09)    |
| T3 (≥2970) [4878.0]         | 166 (34.4)                | 105 (27.6) | 0.54 (0.39–0.75) | 0.44 (0.31–0.64)    | 101 (31.8)                | 10 (30.3) | 0.72 (0.31–1.70) | 0.62 (0.23–1.69)    |
| <i>p</i> -trend             |                           |            | 0.001            | <0.001              |                           |           | 0.584            | 0.526               |
| Male                        |                           |            |                  |                     |                           |           |                  |                     |
| Low-intensity activity      |                           |            |                  |                     |                           |           |                  |                     |
| T1 (0–594) [231.0]          | 100 (31.6)                | 116 (49.2) | 1.00             | 1.00                | 56 (31.1)                 | 8 (50.0)  | 1.00             | 1.00                |
| T2 (594–1386) [792.0]       | 102 (32.2)                | 42 (17.8)  | 0.36 (0.23–0.56) | 0.39 (0.23–0.65)    | 54 (30.0)                 | 1 (6.3)   | 0.13 (0.02–1.07) | 0.12 (0.01–1.38)    |
| T3 (≥1386) [2376.0]         | 115 (36.3)                | 78 (33.1)  | 0.59 (0.40–0.87) | 0.59 (0.38–0.93)    | 70 (38.9)                 | 7 (43.8)  | 0.70 (0.24–2.05) | 0.68 (0.16–2.83)    |
| <i>p</i> -trend             |                           |            | 0.065            | 0.088               |                           |           | 0.906            | 0.853               |
| Moderate-intensity activity |                           |            |                  |                     |                           |           |                  |                     |
| Low (0–720) [0.0]           | 208 (65.2)                | 178 (73.0) | 1.00             | 1.00                | 115 (63.5)                | 11 (64.7) | 1.00             | 1.00                |
| High (≥720) [1440]          | 111 (34.8)                | 66 (27.1)  | 0.69 (0.48–1.00) | 0.55 (0.36–0.84)    | 66 (36.5)                 | 6 (35.3)  | 0.95 (0.34–2.67) | 0.84 (0.24–2.93)    |
| <i>p</i> -trend             |                           |            | 0.050            | 0.006               |                           |           | 0.924            | 0.784               |
| Vigorous-intensity activity |                           |            |                  |                     |                           |           |                  |                     |

|                             |            |            |                  |                  |            |           |                  |                  |
|-----------------------------|------------|------------|------------------|------------------|------------|-----------|------------------|------------------|
| Low (0–960) [0.0]           | 207 (63.7) | 170 (68.0) | 1.00             | 1.00             | 115 (62.5) | 11 (61.1) | 1.00             | 1.00             |
| High ( $\geq$ 960) [2400]   | 118 (36.3) | 80 (32.0)  | 0.83 (0.58–1.17) | 0.71 (0.47–1.07) | 69 (37.5)  | 7 (38.9)  | 1.06 (0.39–2.86) | 1.19 (0.36–3.93) |
| <i>p</i> -trend             |            |            | 0.281            | 0.097            |            |           | 0.908            | 0.771            |
| Total physical activity     |            |            |                  |                  |            |           |                  |                  |
| T1 (0–1188) [495.0]         | 104 (31.3) | 109 (43.4) | 1.00             | 1.00             | 64 (34.6)  | 7 (38.9)  | 1.00             | 1.00             |
| T2 (1188–3390) [2079.0]     | 120 (36.1) | 66 (26.3)  | 0.53 (0.35–0.79) | 0.63 (0.39–1.00) | 55 (29.7)  | 5 (27.8)  | 0.83 (0.25–2.77) | 0.58 (0.14–2.42) |
| T3 ( $\geq$ 3390) [5473.5]  | 108 (32.5) | 76 (30.3)  | 0.67 (0.45–1.00) | 0.61 (0.38–0.97) | 66 (35.7)  | 6 (33.3)  | 0.83 (0.26–2.61) | 0.88 (0.23–3.46) |
| <i>p</i> -trend             |            |            | 0.123            | 0.064            |            |           | 0.779            | 0.992            |
| Female                      |            |            |                  |                  |            |           |                  |                  |
| Low-intensity activity      |            |            |                  |                  |            |           |                  |                  |
| T1 (0–462) [198.0]          | 42 (28.9)  | 56 (45.5)  | 1.00             | 1.00             | 46 (35.9)  | 6 (46.2)  | 1.00             | 1.00             |
| T2 (462–1188) [660.0]       | 53 (36.6)  | 34 (27.6)  | 0.48 (0.27–0.87) | 0.50 (0.26–0.95) | 30 (23.4)  | 5 (38.5)  | 1.28 (0.36–4.56) | 1.50 (0.34–6.64) |
| T3 ( $\geq$ 1188) [1848.0]  | 50 (34.5)  | 33 (26.8)  | 0.50 (0.27–0.90) | 0.50 (0.26–0.95) | 52 (40.6)  | 2 (15.4)  | 0.30 (0.06–1.53) | 0.14 (0.02–1.09) |
| <i>p</i> -trend             |            |            | 0.048            | 0.072            |            |           | 0.117            | 0.049            |
| Moderate-intensity activity |            |            |                  |                  |            |           |                  |                  |
| Low (0–240) [0.0]           | 99 (66.9)  | 91 (71.1)  | 1.00             | 1.00             | 76 (59.4)  | 9 (69.2)  | 1.00             | 1.00             |
| High ( $\geq$ 240) [720.0]  | 49 (33.1)  | 37 (28.9)  | 0.82 (0.49–1.37) | 0.72 (0.41–1.27) | 52 (40.6)  | 4 (30.8)  | 0.65 (0.19–2.22) | 0.65 (0.15–2.77) |
| <i>p</i> -trend             |            |            | 0.453            | 0.257            |            |           | 0.492            | 0.560            |
| Vigorous-intensity activity |            |            |                  |                  |            |           |                  |                  |
| Low (0–484) [0.0]           | 114 (77.0) | 113 (87.6) | 1.00             | 1.00             | 94 (73.4)  | 12 (80.0) | 1.00             | 1.00             |
| High ( $\geq$ 484) [1440.0] | 34 (23.0)  | 16 (12.4)  | 0.48 (0.25–0.91) | 0.48 (0.24–0.98) | 34 (26.6)  | 3 (20.0)  | 0.69 (0.18–2.60) | 0.28 (0.05–1.56) |
| <i>p</i> -trend             |            |            | 0.024            | 0.044            |            |           | 0.585            | 0.147            |
| Total physical activity     |            |            |                  |                  |            |           |                  |                  |
| T1 (0–693) [234.5]          | 50 (33.1)  | 58 (44.6)  | 1.00             | 1.00             | 41 (30.8)  | 6 (40.0)  | 1.00             | 1.00             |
| T2 (693–2128) [1314.0]      | 48 (31.8)  | 43 (33.1)  | 0.77 (0.44–1.35) | 0.93 (0.51–1.71) | 51 (38.4)  | 5 (33.3)  | 0.67 (0.19–2.35) | 0.53 (0.12–2.34) |
| T3 ( $\geq$ 2128) [3555.0]  | 53 (35.1)  | 29 (22.3)  | 0.47 (0.26–0.85) | 0.43 (0.22–0.83) | 41 (30.8)  | 4 (26.7)  | 0.66 (0.18–2.54) | 0.32 (0.06–1.68) |
| <i>p</i> -trend             |            |            | 0.012            | 0.009            |            |           | 0.598            | 0.198            |

Model 1: Crude; Model 2: Adjusted for smoking, first degree family history of gastric cancer, education, occupation, monthly income and total energy intake; Values in the parentheses are the cut off values whereas values in the brackets are the median range values. Units are MET minutes per week.

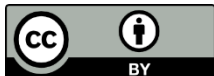

Supplement: s1 [file s1]
